# Supplementary material for: 177Lu-PSMA-617 Therapy in Mice, with or without the Antioxidant α1-Microglobulin (A1M), Including Kidney Damage Assessment Using 99mTc-MAG3 Imaging
Source: PubMed Central journal article supplement (PMC7916794; doi:10.3390/biom11020263), 2021-02-10
Supplement: biomolecules-11-00263-s001.pdf [file biomolecules-11-00263-s001.pdf]

## Supplementary Materials

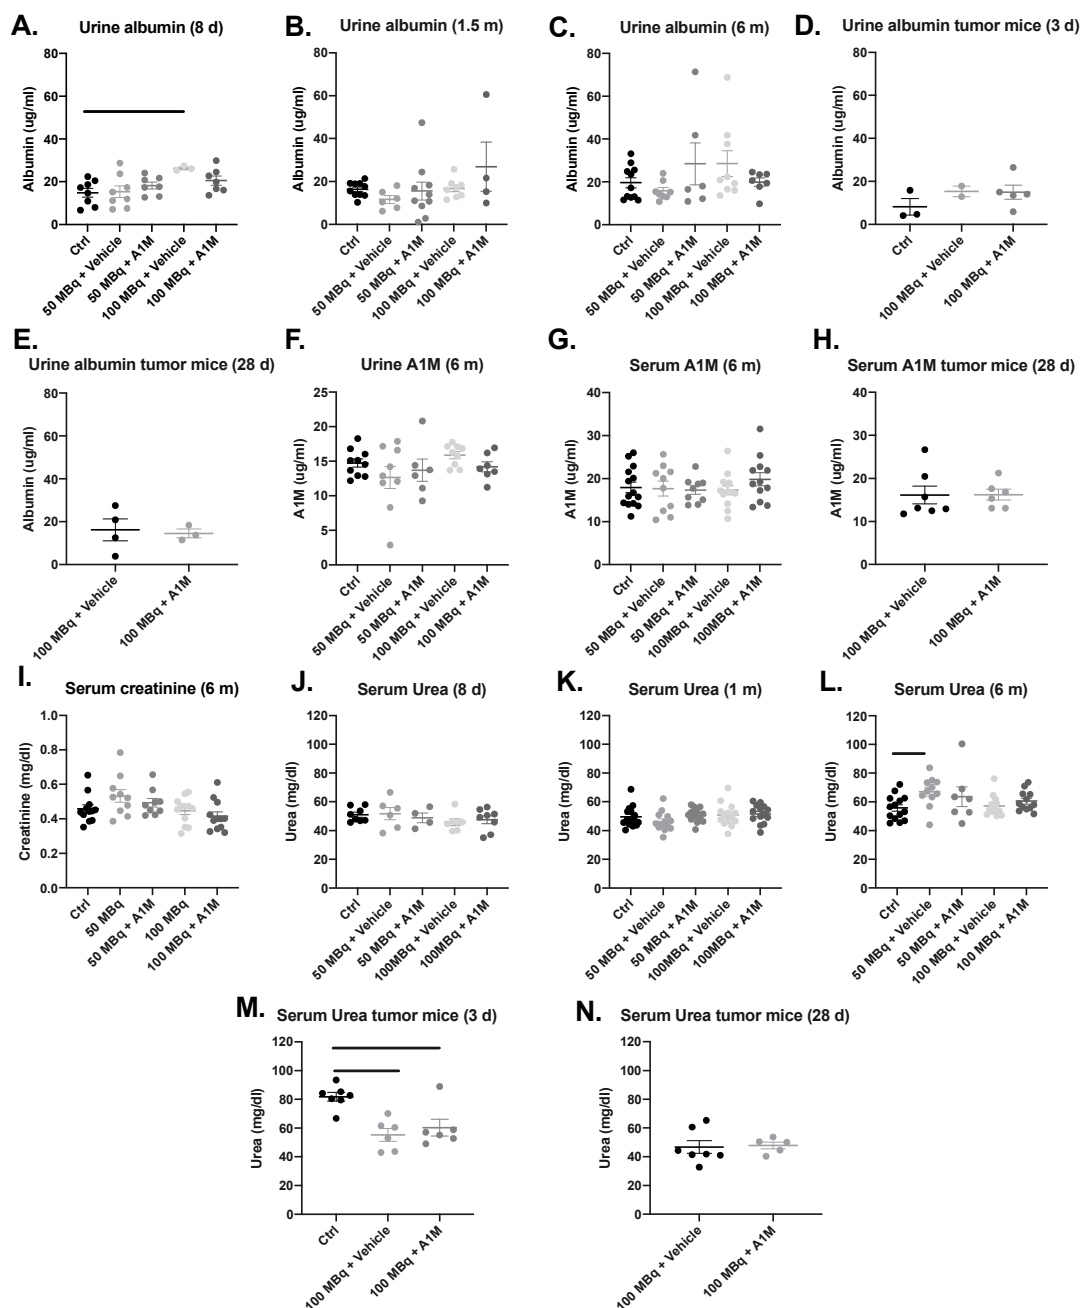

**Supplementary Figure S1.** Biochemical kidney damage markers in mice after injection of  $^{177}\text{Lu}$ -PSMA-617 with or without co-administration of A1M. Albumin in urine sampled at (A) 8 days, (B) 1.5 months, (C) 6 months in mice and (D) 3 days and (E) 28 days in tumor bearing mice. Endogenous A1M levels after 6 months in (F) urine and (G) serum and (H) serum A1M in tumor bearing mice after 28 days. Creatinine levels in serum after (I) 6 months. Urea in serum sampled at (A) 8 days, (B) 1 months, (C) 6 months in non-tumor bearing mice and (D) 3 days and (E) 28 days in tumor bearing mice. Data is presented as mean  $\pm$  SEM (One-way ANOVA with Sidak multiple comparison test for three groups or more and unpaired *t*-test for two groups).

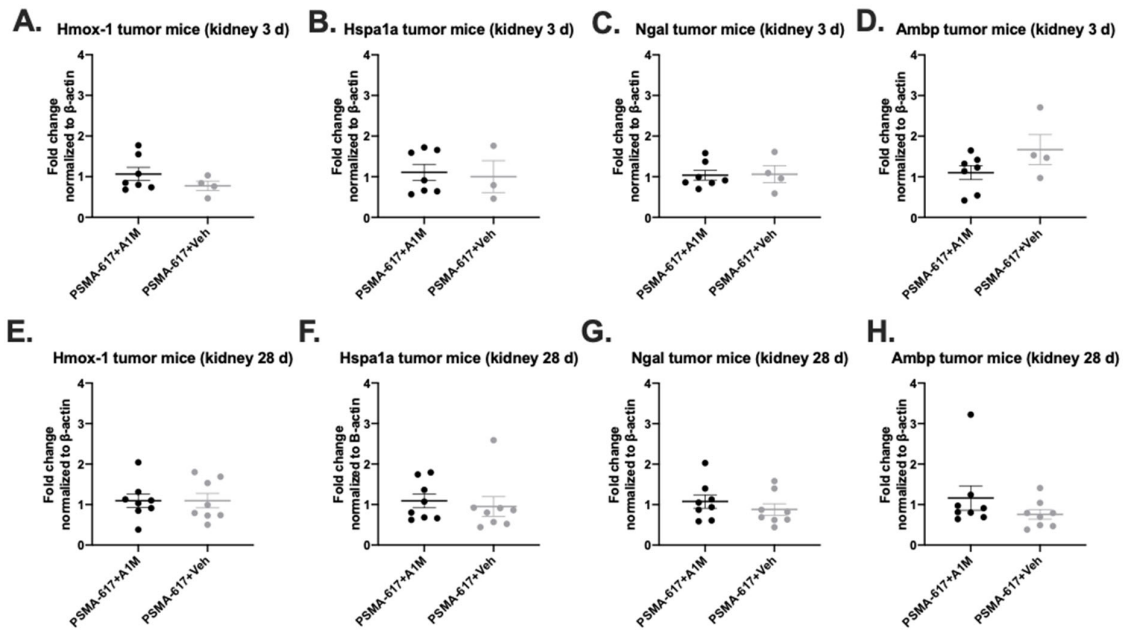

**Supplementary Figure S2.** mRNA levels in kidney tissue of stress and damage related genes in tumor bearing mice after injection of 100 MBq of  $^{177}\text{Lu}$ -PSMA-617 with or without co-administration of A1M (5mg/kg). Expression of (A) Hmox-1, (B) Hspa1a, (C) Ngai and (D) Ambp after three days. Expression of (E) Hmox-1, (F) Hspa1a, (G) Ngai and (H) Ambp after 28 days. Data is presented as fold change (mean  $\pm$  SEM) vs.  $^{177}\text{Lu}$ -PSMA-617 + A1M group.
